# Supplementary material for: Analysis of retrotransposon subfamily DNA methylation reveals novel early epigenetic changes in chronic lymphocytic leukemia
Source: PubMed Central journal article supplement — Haematologica. 2020 Jan 9;106(1):98–110. doi: 10.3324/haematol.2019.228478 (PMC7776340; doi:10.3324/haematol.2019.228478), 2020-01-09
Supplement: 2019_228478_BARROW_SUPPL.pdf [file 2019_228478_BARROW_SUPPL.pdf]

## Analysis of retrotransposon subfamily DNA methylation reveals novel early epigenetic changes in chronic lymphocytic leukemia

Timothy M. Barrow,<sup>1</sup> Nicole Wong Doo,<sup>2,3</sup> Roger L. Milne,<sup>2,4,5</sup> Graham G. Giles,<sup>2,4,5</sup> Elaine Willmore,<sup>6</sup> Gordon Strathdee<sup>7</sup> and Hyang-Min Byun<sup>7</sup>

<sup>1</sup>Faculty of Health Sciences and Wellbeing, University of Sunderland, Sunderland, UK; <sup>2</sup>Cancer Epidemiology Division, Cancer Council Victoria, Melbourne, Australia; <sup>3</sup>Concord Hospital, University of Sydney, Sydney, Australia; <sup>4</sup>Center for Epidemiology and Biostatistics, Melbourne School of Population and Global Health, The University of Melbourne, Melbourne, Australia; <sup>5</sup>Precision Medicine, School of Clinical Sciences at Monash Health, Monash University, Clayton, Australia; <sup>6</sup>CR UK Drug Discovery Unit, Translational and Clinical Research Institute, Newcastle University, Newcastle upon Tyne, UK and <sup>7</sup>Newcastle University Center for Cancer, Biosciences Institute, Newcastle University, Newcastle upon Tyne, UK

©2021 Ferrata Storti Foundation. This is an open-access paper. doi:10.3324/haematol.2019.228478

Received: June 11, 2019.

Accepted: January 7, 2020.

Pre-published: January 9, 2020.

Correspondence: *TIMOTHY BARROW* - timothy.barrow@sunderland.ac.uk

---

## **Supplementary methods**

### **Validation cohort**

Results from the discovery cohort patients from the study by Kulis *et al*<sup>1</sup> were validated in a cohort of 24 CLL patients attending clinic at the Freeman Hospital (Newcastle upon Tyne, UK), Queen Elizabeth Hospital (Gateshead, UK) and Sunderland Royal Hospital (Sunderland, UK). The patient characteristics are provided in Supplementary Table 2. Mononuclear cells were isolated from peripheral blood samples taken from patients with leukocyte counts of  $>30 \times 10^9/L$ , using density centrifugation with Lymphoprep media (Stem Cell Technologies) according to the manufacturer's instructions. Genomic DNA was extracted using the Qiagen Blood and Tissue kit according to the manufacturer's protocol, and analysed by HM450K array at the Edinburgh Clinical Research Facility, University of Edinburgh (United Kingdom). Ethical approval for this study was granted by the North East - Newcastle & North Tyneside 1 Research Ethics Committee (REC reference number 17/NE/0361). All donors provided written informed consent.

### **Identification of microarray probes mapping to retrotransposon subfamilies**

Probes on the HM450K microarray mapping to CpG sites within retrotransposons in the human genome were identified using the Data Integrator function of the UCSC Genome Browser<sup>2</sup> with annotation from RepeatMasker<sup>3</sup> for the human genome build GRCh37/hg19. Those mapping to L1, *Alu*, half-L1 (HAL1), fossil *Alu* monomer (FAM), free right *Alu* monomer (FRAM) and free left *Alu* monomer (FLAM) elements were extracted and taken forward for analysis. Probes with single nucleotide polymorphisms (SNPs) reported at or within 10 base pairs of the target CpG site were included to facilitate the identification of variant-associated differential methylation. L1 elements were categorised into oldest (L1M, mammalian-wide), intermediate (L1P, primate-specific) and youngest (L1HS, human-specific and L1PA, primate-amplified)

subfamilies. L1PAs are active in retrotransposition and have a high sequence similarity to L1HS<sup>4</sup>, thus these subfamilies were categorised together. *Alu* elements were categorised into oldest (*AluJ*), intermediate (*AluS*) and youngest (*AluY*) subfamilies<sup>5</sup>. HAL1, FAM, FLAM and FRAM elements were excluded from analysis by evolutionary age. The subfamilies and number of probes mapping to each are displayed in Figure 1 and Supplementary Table 3.

### **Differential methylation of retrotransposon subfamilies**

Mean differences in methylation ( $\beta$ ) between CLL patients and healthy individuals in the discovery cohort were calculated for each of the loci mapping to retrotransposons, from which the mean methylation change ( $\Delta\beta$ ) for each of the 117 L1 and 37 *Alu* subfamilies was calculated. Analysis of methylation change by subfamily evolutionary age was performed by linear regression using estimates of time since sequence amplification (millions of years ago, MYA) from the studies of Kapitonov *et al*<sup>6</sup> and Khan *et al*<sup>7</sup>.

### **Statistical analyses**

Methylation of L1 and *Alu* elements by subfamily and genomic feature were analysed in samples of normal CD19<sup>+</sup> B-cells from 14 individuals by ANOVA, using data on genomic features extracted from the Illumina HM450K annotation file. Loci that are differentially methylated in CLL were identified by t-test, with significance defined as  $p < 0.05$  following correction for false discovery rate (FDR) by the Benjamini-Hochberg method.

Enrichment of differentially methylated loci by genomic region was examined by Fisher's exact test, using features defined in the Illumina H450K annotation file. Correlations with gene expression were examined by Spearman's rank correlation test. The impact upon patient prognosis was assessed in the Discovery cohort by Kaplan-Meier plot and logrank test, for which patients were dichotomised into high and low expression

groupings by ROC curve analysis, with the optimal threshold determined by the Youden index. Comparison of locus-specific methylation in prospective CLL cases and age-matched controls was made by Mann-Whitney U test, with correlations in DNA methylation between different loci and with time to diagnosis assessed by Spearman's rank correlation test. Where appropriate, p-values were adjusted for multiple hypothesis testing by the Benjamini, Krieger and Yekutieli method ( $q=0.05$ ), with significance defined as  $P_{FDR}<0.05$ . All statistical analyses were performed in R (version 3.4.0) using the ggplot2, heatmap2, qqman and corrplot packages, and in GraphPad Prism (version 7.0b).

## Supplementary references

1. Kulis M, Heath S, Bibikova M *et al.* Epigenomic analysis detects widespread genome-wide DNA hypomethylation in chronic lymphocytic leukemia. *Nat Genet.* 2012;44(11):1236-1242.
2. Kent WJ, Sugnet CW, Furey TS *et al.* The human genome browser at UCSC. *Genome Res.* 2002;12(6):996-1006.
3. Smit AFA, Hubley R, Green P. RepeatMasker Open-4.0. 2013
4. Criscione SW, Zhang Y, Thompson W, Sedivy JM, Neretti N. Transcriptional landscape of repetitive elements in normal and cancer human cells. *BMC Genomics.* 2014;15:583.
5. Mighell AJ, Markham AF, Robinson PA. *Alu* sequences. *FEBS Lett.* 1997;417(1):1-5.
6. Kapitonov V, Jurka J. The age of *Alu* subfamilies. *J Mol Evol.* 1996;42(1):59-65.
7. Khan H, Smit A, Boissinot S. Molecular evolution and tempo of amplification of human LINE-1 retrotransposons since the origin of primates. *Genome Res.* 2006;16(1):78-87.

| Data type        | Study                         | Access code     | Disease / cell type        | n        |                         |   |
|------------------|-------------------------------|-----------------|----------------------------|----------|-------------------------|---|
| DNA methylation  | Kulis <i>et al</i>            | EGAS00001000272 | Normal CD19+ B-cells       | 14       |                         |   |
|                  |                               |                 | CLL                        | 139      |                         |   |
|                  | Hannum <i>et al</i>           | GSE40279        | Healthy                    | 656      |                         |   |
|                  |                               |                 | EPIC                       | 329      |                         |   |
|                  | Young Finns Study             | GSE69270        | Healthy                    | 184      |                         |   |
|                  | Nordlund <i>et al</i>         | GSE47051        | ALL                        | 797      |                         |   |
|                  | Ferreira <i>et al</i>         | GSE62298        | AML                        | 68       |                         |   |
|                  | Maupetit-Mehouas <i>et al</i> | GSE106600       | CML                        | 12       |                         |   |
|                  | Matsunaga <i>et al</i>        | GSE42372        | Lymphoma                   | 31       |                         |   |
|                  | Reinius <i>et al</i>          | GSE35069        | Whole blood                | 6        |                         |   |
|                  |                               |                 | PBMC                       | 6        |                         |   |
|                  |                               |                 | CD16+ neutrophils          | 6        |                         |   |
|                  |                               |                 | Eosinophils                | 6        |                         |   |
|                  |                               |                 | CD14+ monocytes            | 6        |                         |   |
|                  |                               |                 | CD19+ B-cells              | 6        |                         |   |
|                  |                               |                 | CD4+ T-cells               | 6        |                         |   |
|                  |                               |                 | CD8+ T-cells               | 6        |                         |   |
|                  |                               |                 | CD56+ Natural killer cells | 6        |                         |   |
|                  |                               |                 | Lee <i>et al</i>           | GSE45461 | Multipotent progenitors | 6 |
|                  |                               |                 |                            |          | Pre-B-I cells           | 6 |
| Pre-B-II cells   |                               |                 |                            |          | 6                       |   |
| Immature B-cells |                               |                 |                            |          | 4                       |   |
| MCCS             | N/A                           | Control         | 82                         |          |                         |   |
|                  |                               | CLL case        | 82                         |          |                         |   |
| Gene expression  | Kulis <i>et al</i>            | EGAS00001000272 | CLL                        | 139      |                         |   |
|                  | Landau <i>et al</i>           | GSE50006        | Normal CD19+ B-cells       | 32       |                         |   |
|                  |                               |                 | CLL                        | 188      |                         |   |

**Supplementary Table 1: Utilised DNA methylation and gene expression microarray datasets.** Details of the studies from which datasets originated are provided with their Gene Expression Omnibus (GSE) and European Genome-phenome Archive (EGA) accession codes where appropriate.

| <b>Characteristic</b> |            | <b><i>n</i></b> |
|-----------------------|------------|-----------------|
| Patients              | Total      | 24              |
| Gender                | Male       | 16              |
|                       | Female     | 8               |
| Age                   | Median     | 66              |
| Binet stage           | A          | 8               |
|                       | B          | 5               |
|                       | C          | 10              |
|                       | Unknown    | 1               |
| <i>IGHV</i>           | Mutated    | 13              |
|                       | Unmutated  | 10              |
|                       | Equivalent | 1               |

**Supplementary Table 2: Characteristics of CLL patients within the validation cohort.**

| Category                      | Subfamily | Probes |
|-------------------------------|-----------|--------|
| <i>AluJ</i><br>(old)          | AluJb     | 1689   |
|                               | AluJo     | 832    |
|                               | AluJr     | 888    |
|                               | AluJr4    | 154    |
| <i>AluS</i><br>(intermediate) | AluSc     | 377    |
|                               | AluSc5    | 75     |
|                               | AluSc8    | 225    |
|                               | AluSg     | 480    |
|                               | AluSg4    | 88     |
|                               | AluSg7    | 103    |
|                               | AluSp     | 591    |
|                               | AluSq     | 240    |
|                               | AluSq10   | 41     |
|                               | AluSq2    | 606    |
|                               | AluSq4    | 18     |
|                               | AluSx     | 1541   |
|                               | AluSx1    | 1240   |
|                               | AluSx3    | 387    |
|                               | AluSx4    | 63     |
| AluSz                         | 1077      |        |
| AluSz6                        | 474       |        |
| <i>AluY</i><br>(young)        | AluY      | 1256   |
|                               | AluYa5    | 33     |
|                               | AluYa8    | 2      |
|                               | AluYb8    | 23     |
|                               | AluYc     | 94     |
|                               | AluYc3    | 6      |
|                               | AluYd8    | 1      |
|                               | AluYf4    | 15     |
|                               | AluYg6    | 7      |
|                               | AluYh9    | 2      |
|                               | AluYk11   | 3      |
|                               | AluYk4    | 26     |
| <i>Alu</i><br>FAM/FLAM/FRAM   | FAM       | 73     |
|                               | FLAM_A    | 109    |
|                               | FLAM_C    | 201    |
|                               | FRAM      | 90     |
| L1M<br>(old)                  | L1M       | 4      |
|                               | L1M1      | 97     |



|        |     |
|--------|-----|
| L1M2   | 56  |
| L1M2a  | 9   |
| L1M2a1 | 3   |
| L1M2b  | 3   |
| L1M2c  | 3   |
| L1M3   | 48  |
| L1M3a  | 5   |
| L1M3b  | 5   |
| L1M3c  | 9   |
| L1M3d  | 8   |
| L1M3de | 7   |
| L1M3e  | 9   |
| L1M3f  | 19  |
| L1M4   | 176 |
| L1M4b  | 60  |
| L1M4c  | 40  |
| L1M5   | 483 |
| L1M6   | 40  |
| L1M7   | 30  |
| L1MA1  | 18  |
| L1MA10 | 25  |
| L1MA2  | 27  |
| L1MA3  | 71  |
| L1MA4  | 48  |
| L1MA4A | 48  |
| L1MA5  | 28  |
| L1MA5A | 19  |
| L1MA6  | 32  |
| L1MA7  | 39  |
| L1MA8  | 58  |
| L1MA9  | 130 |
| L1MB1  | 32  |
| L1MB2  | 87  |
| L1MB3  | 434 |
| L1MB4  | 110 |
| L1MB5  | 259 |
| L1MB7  | 366 |
| L1MB8  | 212 |
| L1MC   | 110 |
| L1MC1  | 166 |
| L1MC2  | 93  |
| L1MC3  | 216 |

|                       |        |     |
|-----------------------|--------|-----|
|                       | L1MC4  | 407 |
|                       | L1MC4a | 357 |
|                       | L1MC5  | 202 |
|                       | L1MCa  | 48  |
|                       | L1MCb  | 20  |
|                       | L1MCc  | 36  |
|                       | L1MD   | 70  |
|                       | L1MD1  | 119 |
|                       | L1MD2  | 178 |
|                       | L1MD3  | 53  |
|                       | L1MDa  | 75  |
|                       | L1MDb  | 30  |
|                       | L1ME1  | 388 |
|                       | L1ME2  | 135 |
|                       | L1ME2z | 79  |
|                       | L1ME3  | 136 |
|                       | L1ME3A | 212 |
|                       | L1ME3B | 113 |
|                       | L1ME3C | 139 |
|                       | L1ME3D | 34  |
|                       | L1ME3E | 69  |
|                       | L1ME3F | 39  |
|                       | L1ME4a | 271 |
|                       | L1ME5  | 47  |
|                       | L1MEa  | 3   |
|                       | L1MEb  | 16  |
|                       | L1MEc  | 184 |
|                       | L1MEd  | 76  |
|                       | L1MEe  | 54  |
|                       | L1MEf  | 114 |
|                       | L1MEg  | 129 |
|                       | L1MEg1 | 1   |
|                       | L1MEg2 | 5   |
| L1P<br>(intermediate) | L1P1   | 25  |
|                       | L1P2   | 5   |
|                       | L1P3   | 10  |
|                       | L1P3b  | 2   |
|                       | L1P4   | 8   |
|                       | L1P4a  | 12  |
|                       | L1P4c  | 4   |
|                       | L1P4d  | 6   |
|                       | L1P5   | 1   |

|                        |            |     |
|------------------------|------------|-----|
|                        | L1PB       | 4   |
|                        | L1PB1      | 58  |
|                        | L1PB2      | 18  |
|                        | L1PB3      | 35  |
|                        | L1PB4      | 47  |
|                        | L1PBa      | 35  |
|                        | L1PBa1     | 17  |
|                        | L1PBb      | 18  |
|                        | L1PREC2    | 59  |
| L1HS + L1PA<br>(young) | L1HS       | 62  |
|                        | L1PA10     | 40  |
|                        | L1PA11     | 34  |
|                        | L1PA12     | 22  |
|                        | L1PA13     | 27  |
|                        | L1PA14     | 17  |
|                        | L1PA15     | 48  |
|                        | L1PA15-16  | 11  |
|                        | L1PA16     | 93  |
|                        | L1PA17     | 49  |
|                        | L1PA2      | 443 |
|                        | L1PA3      | 429 |
|                        | L1PA4      | 64  |
|                        | L1PA5      | 38  |
|                        | L1PA6      | 35  |
| L1PA7                  | 39         |     |
| L1PA8                  | 19         |     |
| L1PA8A                 | 27         |     |
| L1<br>HAL1             | HAL1       | 313 |
|                        | HAL1-2a_MD | 12  |
|                        | HAL1-3A_ME | 2   |
|                        | HAL1b      | 28  |

**Supplementary Table 3: Distribution of HM450K probes by L1 and *A/u* subfamily.**

| <b>ProbelD</b> | <b>Genomic location</b> | <b>SNPs</b>               | <b>MAF</b>   |
|----------------|-------------------------|---------------------------|--------------|
| cg20820557     | 6:53453216              | rs76774835                | 0.002        |
| cg04258086     | 16:85966544             | rs556243593, rs535919808  | 0.000, 0.000 |
| cg05922591     | 19:55174624             | rs554876917               | 0.000        |
| cg17505852     | 22:30003602             | rs35821749                | NFD          |
| cg11665613     | 1:12268883              | rs888649456               | NFD          |
| cg00981250     | 6:144330345             |                           |              |
| cg16564946     | 6:32304275              | rs555256321               | 0.000        |
| cg10795552     | 5:138605898             | rs527638242               | 0.000        |
| cg22894805     | 15:41983772             | rs747065280               | <0.001       |
| cg17342709     | 2:235319934             |                           |              |
| cg27020349     | 6:144643174             | rs1052158873, rs6911171   | NFD, 0.007   |
| cg08641155     | 16:70469236             | rs545836907               | 0.000        |
| cg18406010     | 14:51137625             | rs140554169               | 0.000        |
| cg02575319     | 16:81602666             | rs11644375                | 0.470        |
| cg10474404     | 3:129148046             | rs964623436, rs765349980  | NFD, NFD     |
| cg25995870     | 19:38571162             | rs1031011006, rs956770938 | NFD, NFD     |
| cg04312999     | 21:45399399             | rs575491202               | 0.000        |
| cg09149541     | 22:19898335             |                           |              |
| cg18286080     | 6:30291349              | rs761784554               | NFD          |
| cg12115081     | 4:151038390             | rs771959741               | NFD          |
| cg14266770     | 9:136721182             | rs778084658               | NFD          |
| cg19679081     | 12:14514672             | rs915031575               | NFD          |
| cg22813097     | 19:18629910             | rs3888232                 | 0.000        |
| cg16386046     | 16:89394863             |                           |              |
| cg17084653     | 22:26822031             | rs200075284, rs142721270  | NFD, 0.000   |
| cg23985408     | 5:171410890             | rs55805925, rs575232522   | 0.009, 0.000 |
| cg07134930     | 2:240176050             | rs1034335966              | NFD          |
| cg02948444     | 17:80741558             | rs187516783, rs750796759  | 0.000, NFD   |

|            |              |                                      |                   |
|------------|--------------|--------------------------------------|-------------------|
| cg25947773 | 2:223771010  | rs920385023                          | NFD               |
| cg16273734 | 1:181087919  |                                      |                   |
| cg16348358 | 1:32731477   | rs575444419                          | 0.000             |
| cg10664272 | 2:85638053   | rs998718100                          | NFD               |
| cg17713912 | 7:103449892  | rs34778492, rs147083966, rs752127891 | 0.210, 0.001, NFD |
| cg07293188 | 3:38209834   | rs575956128, rs552411201             | NFD, 0.001        |
| cg04211501 | 16:85966435  | rs754878910, rs567410565             | NFD, 0.000        |
| cg13988440 | 11:69240805  | rs770280243                          | NFD               |
| cg10180165 | 17:40810558  | rs1027402131                         | NFD               |
| cg23840797 | 6:144330232  |                                      |                   |
| cg14985591 | 10:126274649 | rs190435833, rs561989868             | 0.000, 0.000      |
| cg11848483 | 8:144543485  | rs543377530, rs376594263             | 0.000, NFD        |
| cg20959920 | 17:75238948  | rs766102651                          | NFD               |
| cg27447753 | 2:162047157  | rs370794613                          | NFD               |
| cg26924822 | 4:26332762   | rs115428818, rs80320396              | 0.000, NFD        |
| cg21518709 | 18:3063385   |                                      |                   |
| cg10163122 | 6:34633132   | rs370048158                          | NFD               |
| cg23177739 | 10:71087363  | rs563555918, rs115198540             | NFD, 0.007        |
| cg12079885 | 12:125328475 | rs922267132, rs543984432             | NFD, 0.001        |
| cg15129876 | 11:82865068  | rs979181925, rs187227188             | NFD, 0.000        |
| cg23876355 | 17:47723651  | rs143055540                          | 0.001             |
| cg09153458 | 4:979307     | rs76774835                           | 0.002             |

---

**Supplementary Table 4: SNPs reported at the 50 leading retrotransposon loci.**

SNPs mapping to the CpG dinucleotides (C or G) interrogated by the HM450K probes are provided for the 50 most significantly differentially methylated loci. The HM450K probe ID, genomic position (chromosome and base coordinate) to which they map and SNP are provided, with the minor allele frequency ('MAF') reported in European populations from the 1000 Genomes Project (NFD = no frequency distribution data available).

| ProbeID    | Element | chr         | Gene               | Discovery (n=139) |                         | Validation (n=24) |                        |
|------------|---------|-------------|--------------------|-------------------|-------------------------|-------------------|------------------------|
|            |         |             |                    | $\Delta\beta$     | $P_{FDR}$               | $\Delta\beta$     | $P_{FDR}$              |
| cg20820557 | AluSx   | 6:53453216  |                    | 0.70              | $1.88 \times 10^{-104}$ | -                 | -                      |
| cg04258086 | L1ME3B  | 16:85966544 |                    | 0.58              | $3.83 \times 10^{-87}$  | 0.52              | $4.35 \times 10^{-12}$ |
| cg05922591 | AluY    | 19:55174624 | <i>LILRB4</i>      | 0.59              | $1.44 \times 10^{-78}$  | 0.58              | $4.63 \times 10^{-14}$ |
| cg17505852 | L1M4b   | 22:30003602 | <i>NF2</i>         | 0.69              | $3.81 \times 10^{-78}$  | 0.66              | $2.09 \times 10^{-15}$ |
| cg11665613 | FRAM    | 1:12268883  | <i>TNFRSF1B</i>    | 0.58              | $6.35 \times 10^{-73}$  | 0.60              | $1.52 \times 10^{-12}$ |
| cg00981250 | HAL1b   | 6:144330345 | <i>PLAGL1</i>      | 0.56              | $2.09 \times 10^{-72}$  | 0.55              | $1.29 \times 10^{-10}$ |
| cg16564946 | L1PA16  | 6:32304275  | <i>C6orf10</i>     | 0.55              | $2.97 \times 10^{-70}$  | 0.55              | $1.55 \times 10^{-14}$ |
| cg10795552 | L1MB7   | 5:138605898 |                    | 0.60              | $1.89 \times 10^{-69}$  | 0.65              | $7.67 \times 10^{-14}$ |
| cg22894805 | L1MB8   | 15:41983772 | <i>MGA; MIR626</i> | 0.54              | $3.28 \times 10^{-68}$  | 0.61              | $5.38 \times 10^{-15}$ |
| cg17342709 | AluSg   | 2:235319934 |                    | 0.65              | $2.48 \times 10^{-66}$  | 0.65              | $1.44 \times 10^{-15}$ |
| cg27020349 | AluSx1  | 6:144643174 | <i>UTRN</i>        | 0.68              | $6.10 \times 10^{-66}$  | -                 | -                      |
| cg08641155 | AluSp   | 16:70469236 | <i>ST3GAL2</i>     | 0.48              | $2.48 \times 10^{-64}$  | 0.50              | $2.16 \times 10^{-12}$ |
| cg18406010 | AluSx1  | 14:51137625 |                    | 0.46              | $4.56 \times 10^{-63}$  | 0.56              | $1.24 \times 10^{-11}$ |
| cg02575319 | L1M5    | 16:81602666 | <i>CMIP</i>        | 0.58              | $9.92 \times 10^{-63}$  | -                 | -                      |
| cg10474404 | L1MB7   | 3:129148046 | <i>C3orf25</i>     | 0.49              | $2.85 \times 10^{-62}$  | 0.55              | $1.83 \times 10^{-12}$ |
| cg25995870 | L1MC5   | 19:38571162 | <i>SIPA1L3</i>     | 0.46              | $1.07 \times 10^{-61}$  | 0.47              | $6.14 \times 10^{-10}$ |
| cg04312999 | L1MEd   | 21:45399399 | <i>AGPAT3</i>      | 0.54              | $2.75 \times 10^{-61}$  | 0.67              | $6.60 \times 10^{-15}$ |
| cg09149541 | AluSx1  | 22:19898335 | <i>TXNRD2</i>      | 0.49              | $3.12 \times 10^{-61}$  | 0.52              | $2.11 \times 10^{-10}$ |
| cg18286080 | L1MC4a  | 6:30291349  | <i>HCG18</i>       | 0.52              | $1.68 \times 10^{-59}$  | 0.53              | $2.41 \times 10^{-11}$ |
| cg12115081 | L1PB3   | 4:151038390 | <i>DCLK2</i>       | 0.56              | $4.25 \times 10^{-59}$  | 0.64              | $3.39 \times 10^{-16}$ |
| cg14266770 | L1MB5   | 9:136721182 | <i>VAV2</i>        | 0.51              | $4.90 \times 10^{-58}$  | 0.57              | $1.02 \times 10^{-12}$ |
| cg19679081 | AluSq2  | 12:14514672 |                    | 0.50              | $2.08 \times 10^{-57}$  | 0.49              | $2.82 \times 10^{-10}$ |
| cg22813097 | AluY    | 19:18629910 | <i>ELL</i>         | 0.42              | $5.92 \times 10^{-57}$  | -                 | -                      |
| cg16386046 | L1MD2   | 16:89394863 | <i>ANKRD11</i>     | 0.47              | $2.17 \times 10^{-56}$  | 0.42              | $1.88 \times 10^{-8}$  |
| cg17084653 | AluSx   | 22:26822031 |                    | 0.43              | $1.14 \times 10^{-55}$  | 0.48              | $2.40 \times 10^{-12}$ |
| cg23985408 | L1ME3   | 5:171410890 | <i>FBXW11</i>      | 0.51              | $1.69 \times 10^{-55}$  | 0.59              | $1.78 \times 10^{-11}$ |
| cg07134930 | L1MEe   | 2:240176050 | <i>HDAC4</i>       | 0.54              | $3.00 \times 10^{-55}$  | -                 | -                      |
| cg02948444 | L1MB7   | 17:80741558 | <i>TBCD</i>        | 0.48              | $3.33 \times 10^{-54}$  | 0.53              | $7.45 \times 10^{-11}$ |

|            |        |              |                      |      |                        |      |                        |
|------------|--------|--------------|----------------------|------|------------------------|------|------------------------|
| cg25947773 | L1M4b  | 2:223771010  | <i>ACSL3</i>         | 0.48 | $3.45 \times 10^{-53}$ | 0.51 | $7.51 \times 10^{-11}$ |
| cg16273734 | AluSq2 | 1:181087919  |                      | 0.40 | $3.01 \times 10^{-52}$ | 0.47 | $6.06 \times 10^{-13}$ |
| cg16348358 | FLAM_C | 1:32731477   | <i>LCK</i>           | 0.43 | $7.64 \times 10^{-52}$ | 0.51 | $3.48 \times 10^{-12}$ |
| cg10664272 | AluJo  | 2:85638053   | <i>CAPG</i>          | 0.42 | $3.92 \times 10^{-51}$ | 0.46 | $3.70 \times 10^{-8}$  |
| cg17713912 | HAL1   | 7:103449892  | <i>RELN</i>          | 0.50 | $7.45 \times 10^{-51}$ | 0.53 | $1.88 \times 10^{-9}$  |
| cg07293188 | L1MB7  | 3:38209834   | <i>OXSRI</i>         | 0.45 | $3.20 \times 10^{-50}$ | 0.49 | $5.23 \times 10^{-10}$ |
| cg04211501 | L1ME3B | 16:85966435  |                      | 0.79 | $3.99 \times 10^{-50}$ | 0.79 | $4.09 \times 10^{-21}$ |
| cg13988440 | L1MC2  | 11:69240805  |                      | 0.61 | $9.69 \times 10^{-50}$ | 0.67 | $6.99 \times 10^{-16}$ |
| cg10180165 | L1MB3  | 17:40810558  | <i>TUBG2</i>         | 0.29 | $1.13 \times 10^{-49}$ | -    | -                      |
| cg23840797 | HAL1b  | 6:144330232  | <i>PLAGL1</i>        | 0.51 | $1.14 \times 10^{-48}$ | 0.53 | $3.61 \times 10^{-14}$ |
| cg14985591 | AluSz  | 10:126274649 | <i>LHPP</i>          | 0.41 | $1.29 \times 10^{-48}$ | 0.49 | $8.71 \times 10^{-10}$ |
| cg11848483 | L1MB5  | 8:144543485  | <i>ZC3H3</i>         | 0.52 | $1.63 \times 10^{-48}$ | 0.65 | $6.16 \times 10^{-10}$ |
| cg20959920 | L1MC4  | 17:75238948  |                      | 0.41 | $3.75 \times 10^{-47}$ | 0.45 | $2.28 \times 10^{-9}$  |
| cg27447753 | L1MB3  | 2:162047157  | <i>TANK</i>          | 0.34 | $1.08 \times 10^{-46}$ | 0.43 | $2.29 \times 10^{-12}$ |
| cg26924822 | AluJb  | 4:26332762   | <i>RBPJ</i>          | 0.39 | $2.62 \times 10^{-46}$ | -    | -                      |
| cg21518709 | L1MEd  | 18:3063385   |                      | 0.41 | $2.75 \times 10^{-46}$ | 0.51 | $2.22 \times 10^{-11}$ |
| cg10163122 | AluJo  | 6:34633132   | <i>C6orf106</i>      | 0.44 | $3.80 \times 10^{-46}$ | 0.52 | $2.40 \times 10^{-11}$ |
| cg23177739 | L1ME3C | 10:71087363  | <i>HK1</i>           | 0.38 | $6.27 \times 10^{-46}$ | 0.41 | $6.22 \times 10^{-10}$ |
| cg12079885 | L1ME5  | 12:125328475 | <i>SCARB1</i>        | 0.28 | $1.51 \times 10^{-45}$ | -    | -                      |
| cg15129876 | AluSz  | 11:82865068  |                      | 0.36 | $2.09 \times 10^{-45}$ | 0.45 | $1.08 \times 10^{-10}$ |
| cg23876355 | AluSz  | 17:47723651  | <i>SPOP</i>          | 0.38 | $8.21 \times 10^{-45}$ | -    | -                      |
| cg09153458 | L1MEg  | 4:979307     | <i>SLC26A1; IDUA</i> | 0.50 | $4.56 \times 10^{-44}$ | 0.49 | $4.80 \times 10^{-9}$  |

**Supplementary Table 5: Validation of differentially methylated retrotransposon loci in a second CLL cohort.** Results for the 50 most significantly differentially methylated loci in the discovery cohort are presented. The mean difference in methylation ( $\Delta\beta$ ) between CLL patients and healthy controls (n=14) and the FDR-adjusted p-values are presented for the discovery (n=139) and validation (n=24) cohorts. The Illumina probe ID, retrotransposon type ('Element'), genomic location ('chr') and gene from the Illumina annotation file are provided for each locus. Data was missing for nine of the loci within the validation cohort dataset and could not be examined.

| Probe ID   | Element | Gene            | Genomic feature | Enhancer | Mean methylation ( $\beta$ ) |       |      | Meth/exp correlation |                  | Expression in CLL |                  | OS               |
|------------|---------|-----------------|-----------------|----------|------------------------------|-------|------|----------------------|------------------|-------------------|------------------|------------------|
|            |         |                 |                 |          | B-cell                       | Disc. | Val. | rho                  | P <sub>FDR</sub> | Change            | P <sub>FDR</sub> | P <sub>FDR</sub> |
| cg11665613 | FRAM    | <i>TNFRSF1B</i> | 3'UTR           | TRUE     | 0.86                         | 0.28  | 0.26 | -0.38                | <0.0001          | Increased         | 0.0002           | 0.0088           |
| cg09149541 | AluSx1  | <i>TXNRD2</i>   | Body            |          | 0.88                         | 0.39  | 0.36 | -0.27                | 0.0142           | Increased         | <0.0001          | 0.1880           |
| cg12115081 | L1PB3   | <i>DCLK2</i>    | Body            | TRUE     | 0.85                         | 0.28  | 0.20 | -0.59                | <0.0001          | Increased         | <0.0001          | 0.0011           |
| cg02948444 | L1MB7   | <i>TBCD</i>     | Body            |          | 0.88                         | 0.40  | 0.35 | 0.25                 | 0.0286           | Increased         | 0.0008           | 0.0268           |
| cg27447753 | L1MB3   | <i>TANK</i>     | Body            |          | 0.82                         | 0.49  | 0.40 | -0.25                | 0.0286           | Decreased         | <0.0001          | 0.0007           |
| cg10163122 | AluJo   | <i>C6orf106</i> | Body            | TRUE     | 0.83                         | 0.38  | 0.30 | -0.28                | 0.0142           | Increased         | <0.0001          | 0.0086           |
| cg23177739 | L1ME3C  | <i>HK1</i>      | Body            | TRUE     | 0.85                         | 0.47  | 0.44 | -0.34                | <0.0001          | Increased         | <0.0001          | 0.0201           |

**Supplementary Table 6: Effect of locus-specific hypomethylation on proximal gene expression.** Methylation ( $\beta$ ) at seven loci in CLL patients within the discovery ('Disc.') and validation ('Val.') cohorts, and in normal CD19<sup>+</sup> B-cells isolated from healthy individuals ('B-cell'). The correlation between methylation ( $\beta$ ) and expression (log<sub>2</sub>) within the discovery cohort was calculated by Spearman's rank correlation test ('Meth/Exp correlation'). Differential expression between normal CD19<sup>+</sup> B-cells and CLL was determined by Mann-Whitney U test ('Expression in CLL'). Associations with patient overall survival (OS) were calculated by log-rank test.



| Disease  | cg20820557 | cg04258086 | cg05922591 | cg17505852 | cg11665613 | cg00981250 | cg16564946 | cg10795552 | cg22894805 | cg17342709 |
|----------|------------|------------|------------|------------|------------|------------|------------|------------|------------|------------|
| Hannum   | 0.89 ±0.02 | 0.86 ±0.03 | 0.87 ±0.02 | 0.88 ±0.03 | 0.89 ±0.02 | 0.93 ±0.02 | 0.74 ±0.11 | 0.88 ±0.02 | 0.38 ±0.08 | 0.91 ±0.02 |
| YFS      | 0.94 ±0.01 | -          | 0.90 ±0.01 | 0.92 ±0.02 | 0.93 ±0.01 | 0.95 ±0.01 | 0.79 ±0.07 | 0.90 ±0.01 | 0.48 ±0.07 | 0.94 ±0.01 |
| EPIC     | 0.91 ±0.02 | 0.87 ±0.02 | 0.89 ±0.02 | 0.92 ±0.03 | 0.93 ±0.02 | 0.96 ±0.02 | 0.78 ±0.09 | 0.90 ±0.02 | 0.42 ±0.07 | 0.93 ±0.02 |
| CLL      | 0.16 ±0.12 | 0.26 ±0.14 | 0.22 ±0.15 | 0.18 ±0.09 | 0.28 ±0.17 | 0.32 ±0.17 | 0.29 ±0.15 | 0.26 ±0.18 | 0.25 ±0.14 | 0.18 ±0.11 |
| ALL      | 0.95 ±0.04 | 0.91 ±0.05 | 0.88 ±0.12 | 0.94 ±0.10 | 0.90 ±0.14 | 0.97 ±0.05 | 0.94 ±0.09 | 0.87 ±0.16 | 0.72 ±0.19 | 0.96 ±0.02 |
| AML      | 0.90 ±0.02 | 0.85 ±0.04 | 0.82 ±0.14 | 0.89 ±0.04 | 0.90 ±0.03 | 0.93 ±0.02 | 0.87 ±0.06 | 0.89 ±0.03 | 0.40 ±0.21 | 0.89 ±0.03 |
| CML      | 0.90 ±0.01 | 0.85 ±0.02 | 0.86 ±0.02 | 0.85 ±0.02 | 0.90 ±0.02 | 0.92 ±0.02 | 0.74 ±0.22 | 0.86 ±0.04 | 0.16 ±0.03 | 0.88 ±0.01 |
| Lymphoma | 0.67 ±0.24 | 0.69 ±0.23 | 0.72 ±0.21 | 0.65 ±0.20 | 0.67 ±0.25 | 0.73 ±0.13 | 0.65 ±0.18 | 0.61 ±0.24 | 0.56 ±0.21 | 0.70 ±0.21 |

**Supplementary Table 7: Methylation of the leading 10 retrotransposon loci in healthy individuals and haematological**

**malignancies.** Mean methylation levels ( $\beta \pm SD$ ) for ten leading retrotransposon loci in three studies of healthy individuals (Hannum *et al*, n=656; EPIC, n=329; the Young Finns Study (YFS), n=184), CLL patients within the discovery cohort (n=139), and patients with ALL (n=797), AML (n=68), CML (n=12), and diffuse large B-cell and Burtkitt's lymphomas (Lymphoma, n=31).

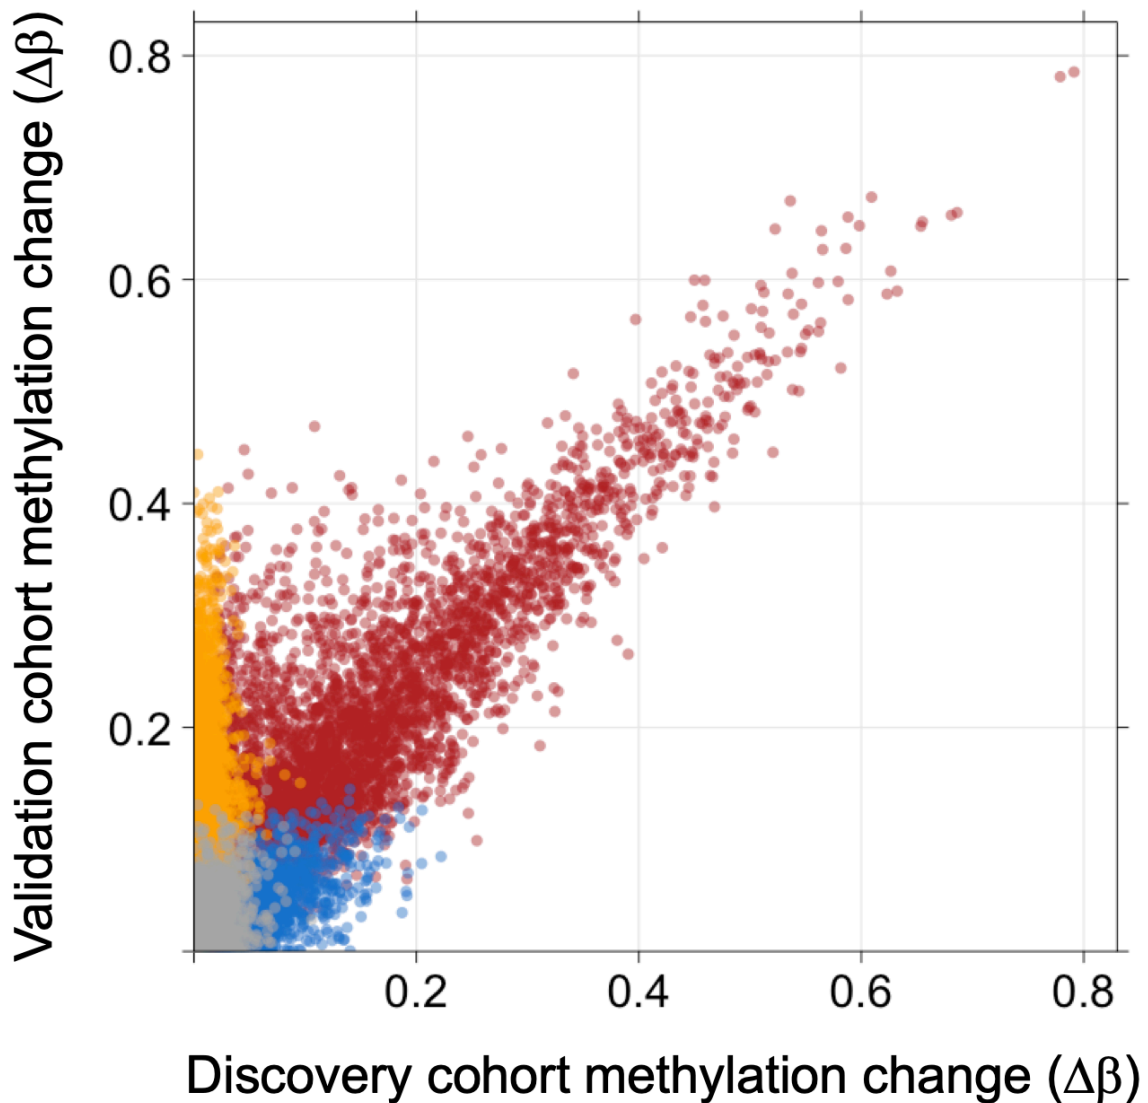

**Supplementary Figure 1: Validation of differentially methylated retrotransposon loci in a second CLL cohort.** Correlation between the absolute difference in methylation ( $\Delta\beta$ ) between CLL patients and healthy individuals observed in the discovery cohort (x-axis; n=139) and the validation cohort (y-axis; n=24). Each of the interrogated retrotransposon loci is represented by a dot that is coloured according to statistical significance ( $P_{\text{FDR}} < 0.05$ ) in both the discovery and validation cohorts (red), only the discovery cohort (blue), only the validation cohort (yellow), or neither (grey).

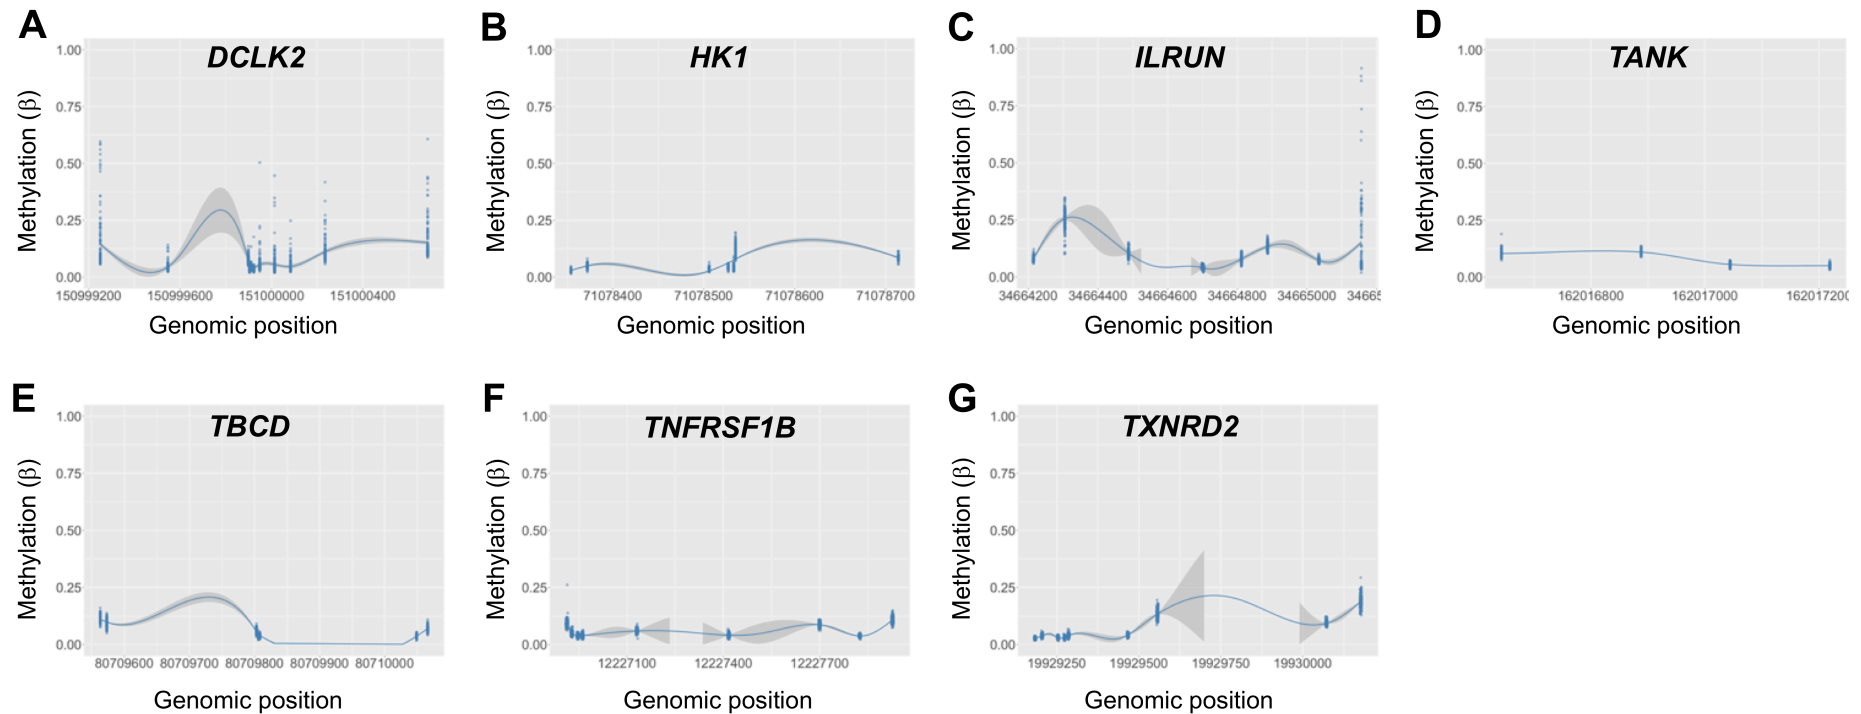

**Supplementary Figure 2: Promoter methylation of seven differentially expressed proximal genes.** DNA methylation ( $\beta$ ) at CpG sites mapping to the promoters of the *DCLK2* (A), *HK1* (B), *ILRUN* (C), *TANK* (D), *TBCD* (E), *TNFRSF1B* (F) and *TXNRD2* (G) genes among 139 chronic lymphocytic patients within the discovery cohort. Promoter-associated loci were identified through the Illumina HumanMethylation 450 microarray annotation file. Genomic position is according to the human genome build GRCh37/hg19.
